# Supplementary material for: Evaluating Arctic clouds modelled with the Unified Model and Integrated Forecasting System
Source: Copernicus journal article supplement (doi:10.5194/acp-2021-662), 2021-09-09
Supplement: Supplementary file 1 [file acp-2021-662-supplement.pdf]

# 1 **Evaluating Arctic clouds modelled with the Unified Model and** 2 **Integrated Forecasting System: Supporting Information**

3 Gillian Young<sup>1</sup>, Jutta Vüllers<sup>1</sup>, Peggy Achtert<sup>2</sup>, Paul Field<sup>1,3</sup>, Jonathan J. Day<sup>4</sup>, Richard Forbes<sup>4</sup>, Ruth  
4 Price<sup>1</sup>, Ewan O'Connor<sup>5</sup>, Michael Tjernström<sup>6</sup>, John Prytherch<sup>6</sup>, Ryan Neely III<sup>1,7</sup>, and Ian M. Brooks<sup>1</sup>

5 <sup>1</sup>Institute for Climate and Atmospheric Science, School of Earth and Environment, University of Leeds, Leeds, UK

6 <sup>2</sup>Meteorological Observatory Hohenpeißenberg, German Weather Service, Germany

7 <sup>3</sup>Met Office, Exeter, UK

8 <sup>4</sup>European Centre for Medium-Range Weather Forecasts, Reading, UK

9 <sup>5</sup>Finnish Meteorological Institute, Helsinki, Finland

10 <sup>6</sup>Department of Meteorology, Stockholm University, Sweden

11 <sup>7</sup>National Centre for Atmospheric Science, School of Earth and Environment, University of Leeds, Leeds, UK

12 *Correspondence to:* Gillian Young ([G.Young1@leeds.ac.uk](mailto:G.Young1@leeds.ac.uk))

## 13 **S1 Cloudnet**

### 14 **S1.1 Cloud fractions**

15 Cloudnet produces a cloud fraction variable,  $C_V$ , in each model output file, which represents the Cloudnet cloud fraction  
16 calculated from observational data (from radar, lidar etc.) combined with the temperature and humidity profiles defined by the  
17 filename. For example,  $C_V$  in the UM\_RA2M output corresponds to model temperature and humidity profiles combined with  
18 retrieved cloud properties from the remote sensing instruments on board *Oden* to produce a defined cloud fraction. These  $C_V$   
19 variables from the observation, UM\_RA2M, and ECMWF\_IFS Cloudnet output files are shown in **Fig. S1**. *Obs\_Cv* represents  
20 the measured/retrieved temperature profiles with reference to the radar vertical grid. **Figure S1** therefore demonstrates that the  
21 chosen grid on which the  $C_V$  data are shown have little impact on the mean profile.

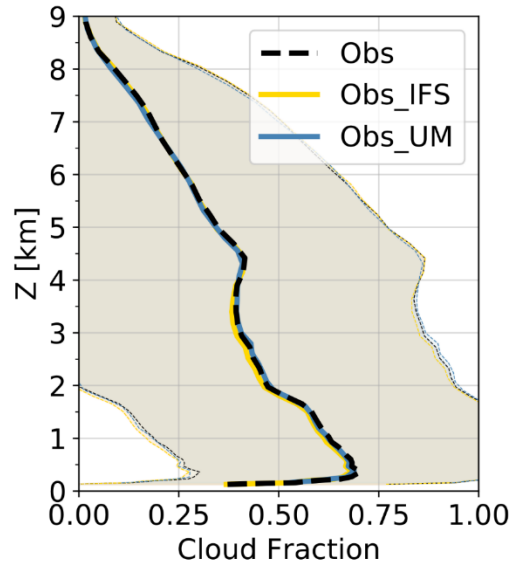

**Figure S1:** Comparison of cloud fraction ( $C_V$ ) on native radar (Obs), IFS (Obs\_IFS), and UM LAM (Obs\_UM) vertical grid.

22 Poor comparisons between modelled and observed cloud fractions is a perennial problem in climate science, and our results  
 23 indicate that the large-scale cloud scheme used to represent sub-grid-scale variability in the  $RH$  field may be responsible for  
 24 producing particularly poor comparisons with observations. Cloudnet represents sub-grid-scale variability in observed cloud  
 25 fractions by assigning a value of 0 or 1 at each vertical point, dependent on whether there is any form of cloud water present  
 26 (including frozen precipitation), before data are averaged from the raw sample frequency to the model grid. This assignment is  
 27 not necessarily equivalent to a model's bulk cloud fraction by volume,  $C_V$ , given the parameterisation of sub-grid-scale  
 28 processes in models is imposed after the calculation of advected parameters. This discrepancy is not a new finding; **Illingworth**  
 29 **et al., (2007)** noted the UM – both global and mesoscale variants using the **Smith (1990)** large-scale cloud scheme – had  
 30 difficulty with simulating completely cloudy grid boxes. Similarly, **Hogan et al. (2001)** have previously shown that the  
 31 ECMWF IFS underpredicts the fraction of observed cloud below 7 km.

32 Cloud fractions are diagnostic for UM\_RA2M and UM\_CASIM-100 (following **Smith, 1990**); prognostic for ECMWF\_IFS  
 33 and UM\_RA2T (using PC2 scheme; **Wilson et al., 2008**). Both diagnostic and prognostic approaches use the instantaneous  
 34 condensation assumption applied to a PDF of moisture and temperature (**Bush et al., 2020**). In the **Smith (1990)** scheme, the  
 35 liquid and ice cloud fractions,  $C_{liq}$  and  $C_{ice}$ , are diagnosed from prognostic grid-box mean liquid and ice mass mixing ratios,  
 36  $q'_{liq}$  and  $q'_{ice}$  (**Wilson et al., 2008; Bush et al., 2020**), which are then combined assuming minimum overlap to compute  $C_V$ .  
 37 The  $C_{liq}$  would be 0.5 when the grid-box mean total specific humidity is at saturation for the given temperature, since the  
 38 parameterisation PDF of sub-grid-scale variability in  $RH$  and temperature is symmetric (**Wilson et al., 2008**). The **Smith (1990)**  
 39 scheme was designed this way to keep the  $RH$  and bulk cloud fraction at realistic values (less than 1) over large grid-boxes. In  
 40 our UM simulations, this cloud fraction is supplemented by an empirical adjustment based on aircraft observations (**Wood and**  
 41 **Field, 2000**) which affects the rate at which cloud fraction increases once  $RH_{crit}$  is reached, increasing  $C_V$  up to 0.7 at 100%

42  $RH$ ; however, this adjustment is still insufficient to attain the cloud fractions approximately equal to 1 obtained from our  
43 observations.

44 Both the PC2 scheme in UM\_RA2T and the cloud scheme in ECMWF\_IFS are based on **Tiedtke (1993)**; both use prognostic  
45 cloud fraction and condensate variables, with the former calculated directly from condensate sources/sinks rather than being  
46 linked to the grid-box mean liquid water mixing ratio (as in the **Smith 1990** scheme; **Forbes and Ahlgrimm, 2014**). In the  
47 PC2 scheme,  $C_{liq}$  is not diagnosed from  $q'_{liq}$ ; therefore, autoconversion does not affect  $C_{liq}$ , but does alter  $q'_{liq}$ , allowing thin  
48 clouds with low  $q'_{liq}$  to maintain a high  $C_{liq}$  (**Wilson et al., 2008; Bush et al., 2020**). Given the results described here, it appears  
49 that this functionality is critical to replicating cloud fractions comparable to those calculated from observations using Cloudnet.  
50 UM\_RA2T also has the extra source of sub-grid turbulent production of mixed-phase cloud; in a test with this option switched  
51 off it was found that this process does not account for the improved cloud fraction comparison with observations (**Fig. S2**).

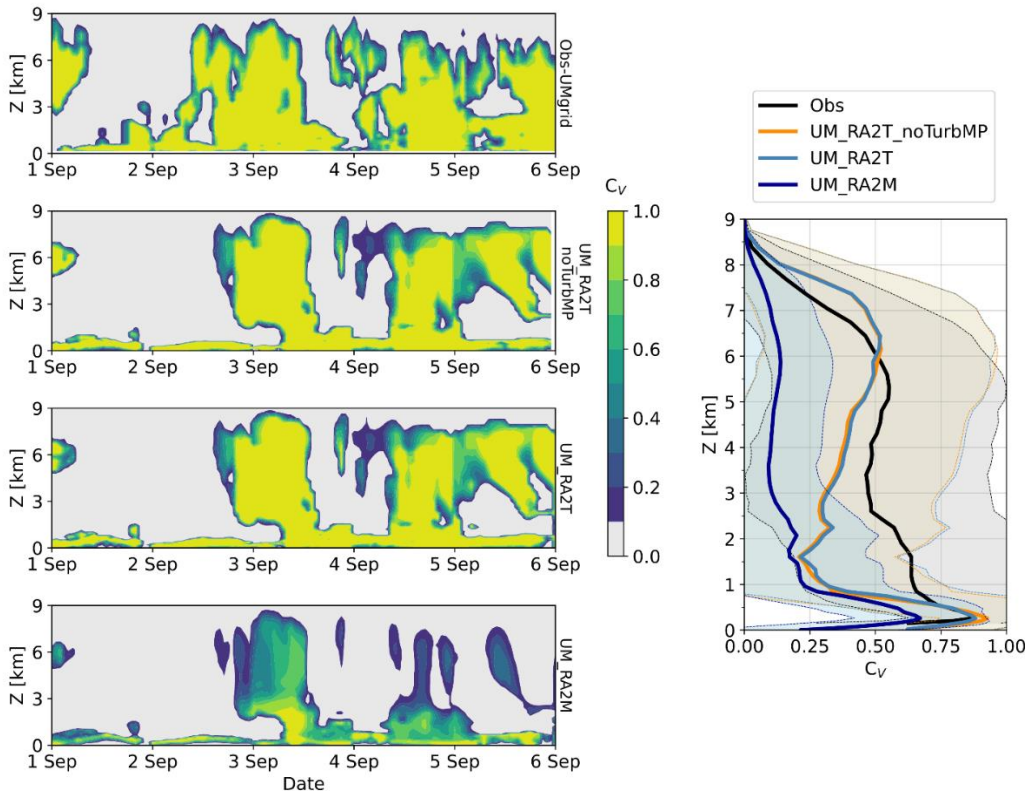

**Figure S2:**  $C_v$  (a) observed and modelled by (b) UM\_RA2T without sub-grid turbulent production of mixed-phase cloud switched on (UM\_RA2T\_noTurbMP), (c) UM\_RA2T, and (d) UM\_RA2M for a subset of the drift period (1 Sep to 6 Sep), illustrating that the inclusion of this sub-grid process does not account for the high cloud fractions modelled by the UM\_RA2T case.

52 With 3 separate cloud fractions instead of one total fraction (as represented in **Smith, 1990**), the PC2 scheme can represent  
53 overlap between the liquid and ice fractions, i.e., a mixed-phase cloud fraction (**Wilson et al., 2008**). This ability is likely

54 important in reproducing the common mixed-phase clouds in the Arctic. The liquid cloud fraction represented by PC2 is  
55 equivalent to the total cloud fraction diagnosed by **Smith (1990)**, whereas the ice cloud fraction is calculated from the  
56 prognostic  $q_{ice}$ . The total cloud fraction is then the volume of a grid-box containing cloud, calculated assuming minimum  
57 overlap, between the liquid and ice cloud fractions (**Wilson et al., 2008**). As such, PC2 can represent a wide range of *IWC* for  
58 the same cloud fraction, whereas this relationship is fixed for a given temperature with the **Smith (1990)** scheme.

59 It is important to note that any frozen precipitation measured below an upper cloud layer will also be classed as cloud by  
60 Cloudnet. Some of the discrepancy in cloud fraction may then be due to observed precipitating clouds masking several cloud  
61 layers, while this layering may be captured by our models. However, one must note that the **Wilson and Ballard (1999)**  
62 microphysics scheme makes this same assumption regarding frozen precipitation. Alternatively, little-to-no precipitation  
63 between layers in our models would negatively affect this cloud fraction comparison. By treating all cloud ice the same, it may  
64 be difficult to distinguish between multi-layered clouds using Cloudnet if any are precipitating.

65 In summary, our data highlight the difficulty of diagnostic cloud fractions, such as that computed by the **Smith (1990)** scheme,  
66 to produce fully cloudy grid boxes on fine grid scales and indicate that models represent cloud fractions in different ways;  
67 therefore, cloud water content analyses should be conducted in addition to cloud fraction comparisons when studying Arctic  
68 clouds to provide a more robust model-observation comparison than using cloud fractions alone. **Figure S3** demonstrates how  
69 using a *TWC* threshold to define in- and out-of-cloud regions can give a more consistent comparison between the observations  
70 and models.

## 71 **S1.2 Averaging observations to model grid**

72 Liquid and ice water contents are calculated at Stage 2a of Cloudnet (**Illingworth et al., 2007**) using the various measured  
73 inputs described in **Sect. 2.2** of this study and referencing the radar height grid and time resolution. For comparison with  
74 numerical models, Cloudnet includes several additional functions in Stage 2b to average these observational data on to the  
75 corresponding model grids in a consistent manner.

76 Observational data are split into each model grid box then statistics are calculated, e.g., grid-box mean liquid water content. To  
77 ensure that there are enough data present in each box, a quality factor is applied: this factor is defined by default to be related  
78 to 90% of the grid box size, designed at Cloudnet's creation to ensure that there were enough observational data within each >  
79 10 km model grid box for meaningful statistical comparisons. However, we found that this high value for the quality-control  
80 factor was too efficient in filtering out data with our higher spatial resolution (1.5 km) grid boxes.

81 This factor was reduced to 10% or 30% respectively for the IFS and UM grids utilised in this study to reduce the number of  
82 profiles required for meaningful statistics within each 4D box. Code failures relating to too few data restricted the UM quality  
83 factor being reduced further than 30%, but this is unsurprising given each box is  $1.5 \times 1.5$  km in this study.

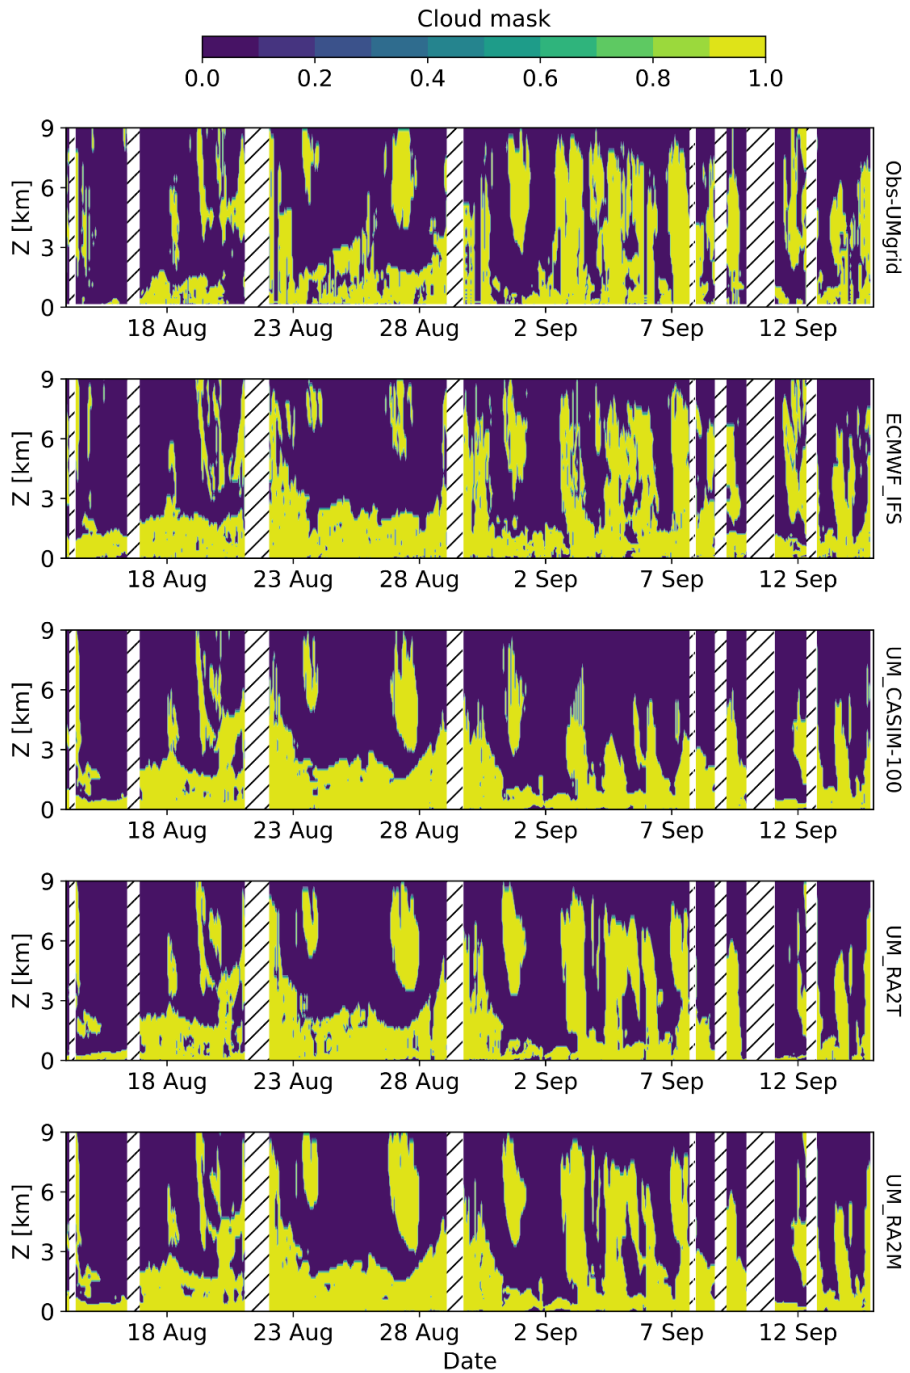

**Figure S3:** Comparison of cloud masks built using the in-cloud *TWC* threshold described in **Sect. 2.4**. *TWC* is calculated using all *LWC* and *IWC* data, then thresholding is applied.

86 S2 Model surface albedo

87 As mentioned in the main body of this study, the IFS is coupled to a simple 0.25° resolution sea-ice model (Louvain-la-Neuve  
88 Sea Ice Model, LIM2) which provides sea ice fractions to the IFS and the surface flux tiling scheme (Buizza et al., 2017;  
89 Keeley and Mogensen, 2018). The surface energy balance over the sea ice fraction is, however, calculated separately from  
90 LIM2 using an albedo parameterisation following Ebert and Curry (1993) with fixed monthly climatology values interpolated  
91 to the actual time, and a heat flux through the ice calculated using a constant sea-ice thickness of 1.5 m.

92 The surface albedo parameterisation used within the global and regional UM is dependent on ice surface temperature, where  
93 the relationship itself is unchanged from Birch et al. (2009). Both UM\_RA2M and UM\_RA2T use the default Regional  
94 Atmosphere surface albedo thresholds, giving a 50% albedo at 0 °C which increases to 80% at -10 °C. Gilbert et al. (2020)  
95 tested both configurations for polar cloud modelling over the Antarctic Peninsula, finding that the surface albedo was modelled  
96 to within 2% of observed values.

97 For UM\_CASIM-100, we adapted the warm ice temperature albedo of the LAM to 72% (at 0 °C), with 80% albedo achieved  
98 at -2 °C, to match the parameterisation limits currently used in the JULES (Joint UK Land Environment Simulator) surface  
99 scheme of the Global Atmosphere 6.0 global model (under the assumption that snow is present on the sea ice surface). For the  
100 drift period, we know that snow was indeed present on the surface from first-hand knowledge and surface imagery.

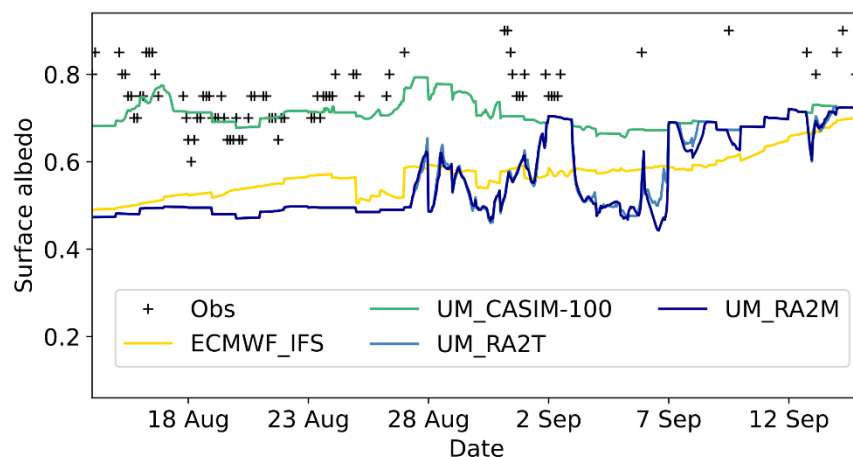

Figure S4: Surface albedo estimated from surface images of ice cover taken from the ship (Obs, black crosses) and diagnosed by the models.

101 Figure S4 shows model surface albedo as a function of time throughout the drift period, with estimations from ship-based  
102 observations shown as black crosses. The largest discrepancy between the models is during the melt period of the drift (before  
103 28 Aug): UM\_CASIM-100 performs well with comparison to our estimations, however the other three simulations  
104 underestimate by approximately 20%. Agreement between the models improves during the freeze when the surface temperature  
105 begins to fall; however, our few observational data points during this period suggest that the models are still underestimating  
106 albedo by approximately 10-15%.



107 While this comparison suggests that the models are performing poorly with regards to surface reflectivity, one must note that  
 108 the models are representing the albedo of a 1.5/9 km grid box (UM/IFS, respectively) while the observed estimates are taken  
 109 from the area immediately surrounding the ship. Therefore, any reduction in model albedo due to e.g., melt ponds or leads  
 110 would not be accounted for in our observational estimates.

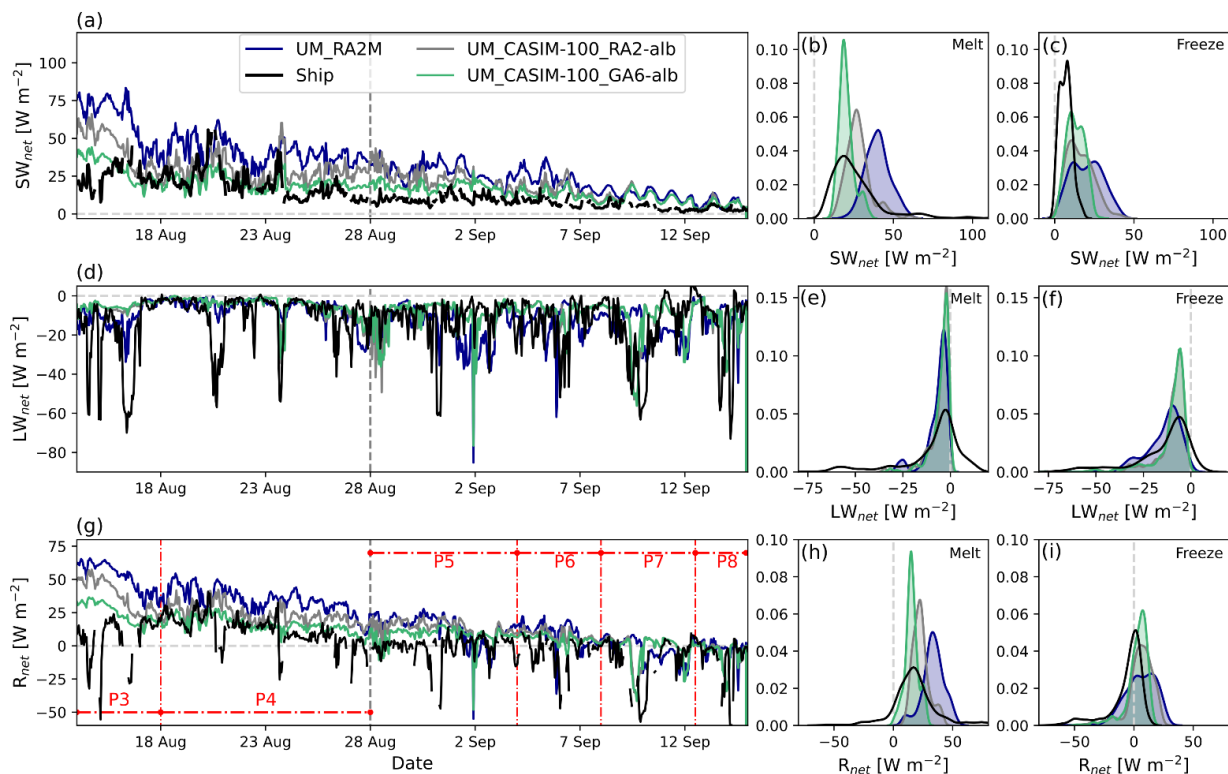

**Figure S5:**  $SW_{net}$ ,  $LW_{net}$ , and  $R_{net}$  simulated by UM\_CASIM-100 with albedo options for the Regional Atmosphere version 2 (UM\_CASIM-100\_RA2-alb; grey), updated Global Atmosphere version 6.0 (UM\_CASIM-100\_GA6-alb; green) used in the main body of this study, and UM\_RA2M (dark blue) for reference. Hourly-averaged measurements on board the ship (black) shown for comparison. LHS: timeseries; RHS: PDFs. PDFs are split between melting and re-freezing sea ice conditions using a threshold of 28 Aug as indicated by the grey vertical dashed line in panels (a), (d), and (g). Radiation terms are defined as positive downwards. Sub-periods used in subsequent sections are marked (red) in panel (g).

111 **Figure S5** shows the surface radiative balance modelled in UM\_CASIM-100 (as **Fig. 2**, here labelled UM\_CASIM-100\_GA6-  
 112 alb) and UM\_CASIM-100 with the default Regional Atmosphere limits for the surface albedo parameterisations used (labelled  
 113 UM\_CASIM-100\_RA2-alb, as used in UM\_RA2M and UM\_RA2T). **Figure S5** therefore shows that the cloud physics  
 114 representation of UM\_CASIM-100 does still improve radiative interactions, with comparison with our observations, over  
 115 UM\_RA2M (and UM\_RA2T, not shown). Thus, the surface albedo updates are not the sole cause of its improved performance  
 116 over the operational UM schemes; however, the combination of the updated surface albedo (to represent snow on sea ice) and

117 improved cloud microphysical representation (from the CASIM scheme) yields the best UM comparison with observations (as  
118 presented in the main body of this study).

### 119 S3 UK Chemistry and Aerosol (UKCA) model

120 UKCA simulates gas and aerosol chemistry and transport in the atmosphere using the GLObal Model of Aerosol Processes  
121 (GLOMAP-Mode, Mann et al., 2010) and an atmospheric chemistry scheme, with an additional boundary layer nucleation  
122 scheme used to simulate gas-to-particle conversion of sulphuric acid to sulphate aerosol (Spracklen et al., 2010). To generate  
123 the aerosol input files for CASIM, UKCA was one-way coupled to the UM at version 11.2 using the Global Atmosphere 7.1  
124 dynamical core (Walters et al., 2019). Daily averaged soluble accumulation- and coarse-mode aerosol number and mass  
125 concentrations calculated from UKCA grid points north of 88.125 °N (Fig. S2) were used as input to the UM.

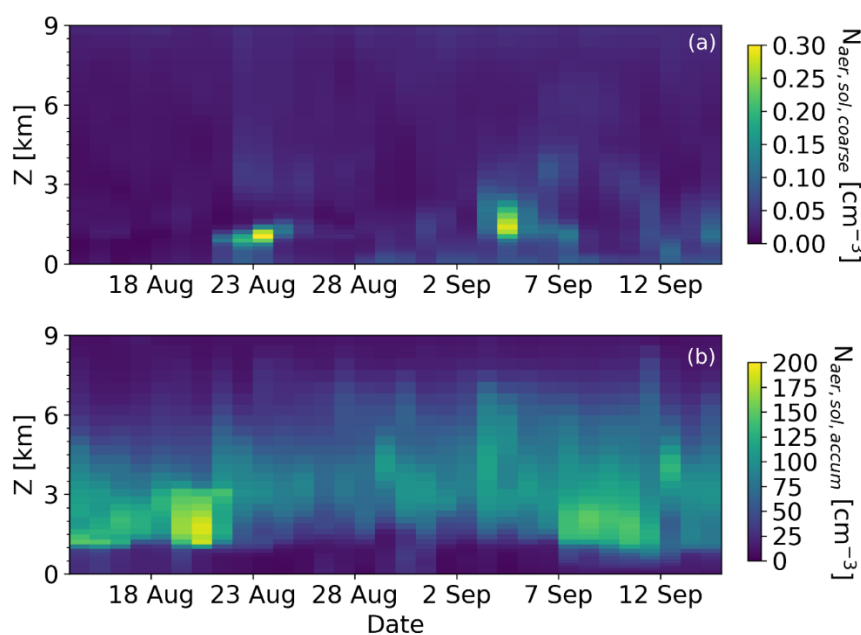

**Figure S6:** Soluble (a) coarse- and (b) accumulation-mode aerosol number concentrations simulated by UKCA and used as input for the CASIM scheme in the UM\_CASIM-AeroProf simulation. Aerosol profiles are kept constant over each daily forecast, with no aerosol processing by cloud.

### 126 S4 Periods of consistent meteorology

127 To better understand how the model thermodynamic biases relate to cloud properties in each simulation, we split our drift  
128 period further into four subsections – periods 3 to 6, as illustrated in Figs. 2 and 8 – to study periods of consistent meteorology.  
129 Mean equivalent potential temperature ( $\theta_e$ ) and  $q$  profiles measured by radiosondes during these periods are shown in Fig. 12.  
130 Of the four periods considered, period 3 had cloud-free conditions most often. Periods 5 and 6 were similar; both were cloudy  
131 and influenced synoptically by three different low-pressure systems over their duration.

132



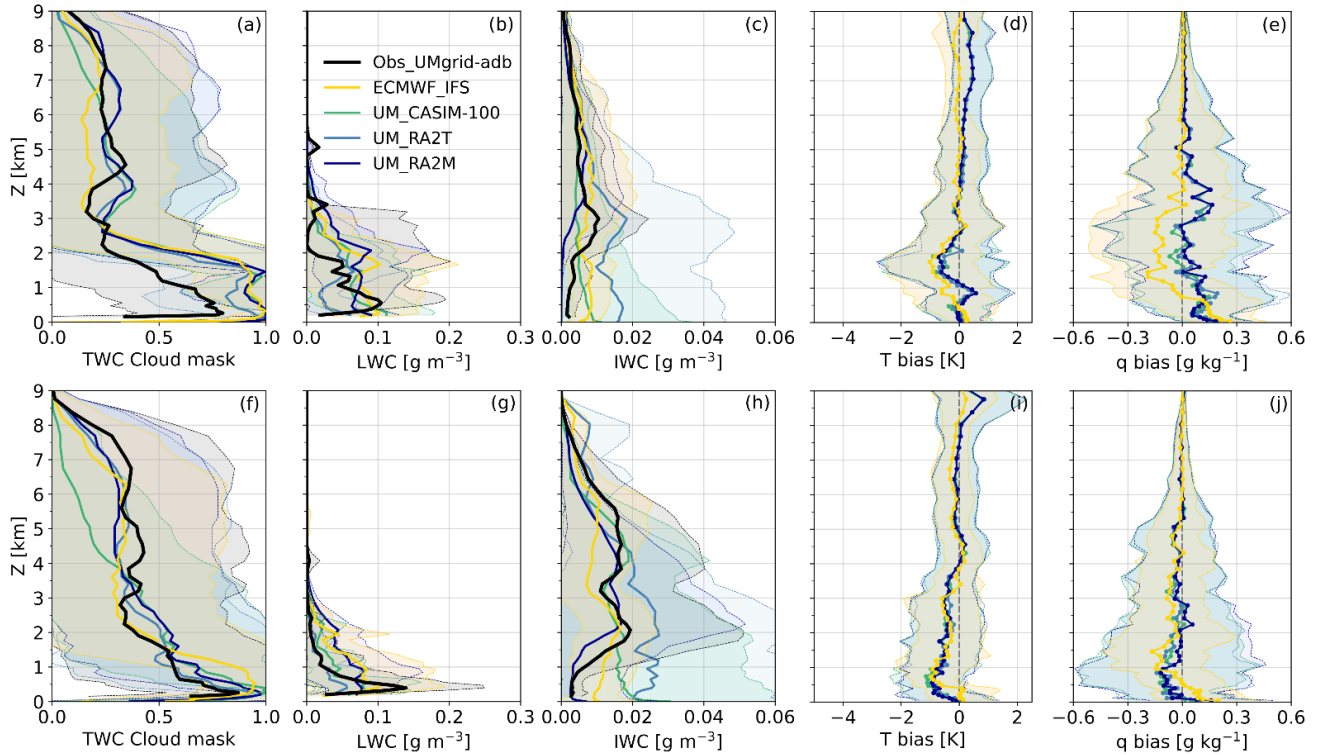

**Figure S7:** (As **Fig. 13**) Comparison of mean cloud mask, LWC, and IWC profiles with median biases in T and q with respect to radiosondes for period 4 (**a–e**, top row) and period 5 (**f–j**, bottom row). Again, observed LWC calculated assuming adiabatic conditions using Cloudnet.  $\pm$  one standard deviation shown in shading to illustrate variability.

133 **Figure S7** shows comparisons of the *TWC* cloud mask, in-cloud *LWC* and *IWC*, and associated *T* and *q* biases over periods 4  
 134 and 5. Both periods 4 and 5 support the findings of periods 3 and 6. During period 4, the models overpredict cloud occurrence  
 135 below 2 km similar to period 3; however, both the *LWC* and *IWC* are in better agreement with observations during period 4.  
 136 Similarly, all simulations agree better with observed cloud occurrence during period 5 (consistent with our result for period 6),  
 137 and both the *LWC* and *IWC* are again in reasonable agreement during this time window. Consequently, the model  
 138 thermodynamic biases with respect to radiosonde measurements are weaker (though still present) during periods 4 and 5 than  
 139 during periods 3 and 6.

## 140 S5 Primary ice nucleation parameterisation

141 UM\_RA2M and UM\_RA2T use the **Fletcher (1962)** parameterisation for primary ice formation, while ECMWF\_IFS uses  
 142 **Meyers et al. (1992)** and UM\_CASIM-100 uses **Cooper (1986)**. Each of these parameterisations is inherently temperature-  
 143 dependent, with **Meyers et al., (1992)** producing the largest ice number concentration, and **Fletcher (1962)** producing the  
 144 smallest, at e.g.,  $-10$  °C. To test whether the method of parameterising primary ice itself has any effect on these biases, we  
 145 trialled the use of each of the **Fletcher (1962)**, **Cooper (1986)**, and **Meyers et al. (1992)** parameterisations within the CASIM  
 146 framework; however, we found little difference in our tropospheric ice due to the different parameterisation methods (**Fig. S7**).

147 Changing the primary ice parameterisation alters biases slightly within the lowest 3 km of the domain, with a maximum  
148 difference of  $0.06 \text{ g kg}^{-1}$  between the UM\_CASIM-100\_Cooper and UM\_CASIM-100\_Meyers median  $q$  biases at 1.3 km.  
149 Differences shown here are much smaller than the more significant UM configurations changes/IFS comparison shown in **Figs.**  
150 **9, 11, 13**.

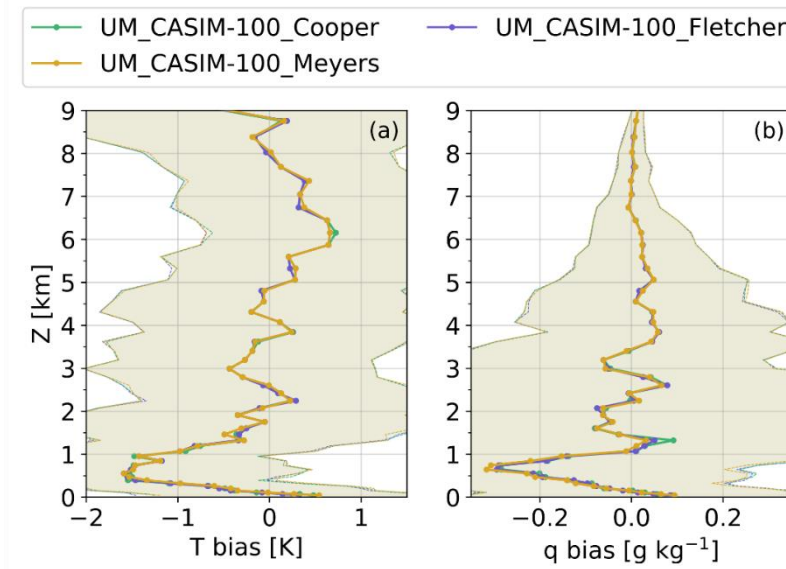

**Figure S8:** Comparison of  $T$  and  $q$  biases (with respect to radiosonde measurements) of CASIM-100 runs with different primary ice production parameterisations imposed (green: **Cooper, 1986**; purple: **Fletcher, 1962**; gold: **Meyers et al., 1992**), over the drift subset of 31 Aug to 5 Sep. Here, UM\_CASIM-100\_Cooper is equivalent to UM\_CASIM-100 data shown in the main body of the paper.

151

152

153 **References**

- 154 **Buizza, R., J.-R. Bidlot, M. Janousek, S. Keeley, K. Mogensen & D. Richardson, 2017:** New IFS cycle brings sea-ice coupling  
155 and higher ocean resolution, *ECMWF Newsletter* No. 150, 14–17.
- 156 **Bush, M., Allen, T., Bain, C., Boutle, I., Edwards, J., Finnenkoetter, A., Franklin, C., Hanley, K., Lean, H., Lock, A., Manners,**  
157 **J., Mittermaier, M., Morcrette, C., North, R., Petch, J., Short, C., Vosper, S., Walters, D., Webster, S., Weeks, M., Wilkinson,**  
158 **J., Wood, N., and Zerroukat, M.:** The first Met Office Unified Model–JULES Regional Atmosphere and Land configuration,  
159 *RAL1, Geosci. Model Dev.*, 13, 1999–2029, <https://doi.org/10.5194/gmd-13-1999-2020>, 2020.
- 160 **Cooper, W. A.:** Ice Initiation in Natural Clouds, *Meteorological Monographs*, 21, 29–32, doi:10.1175/0065-9401-21.43.29,  
161 1986.
- 162 **Fletcher:** The Physics of Rain Clouds. *Cambridge Univ Press*, Cambridge, UK, 1962.
- 163 **Forbes and Ahlgrimm, 2014:** On the Representation of High-Latitude Boundary Layer Mixed-Phase Cloud in the ECMWF  
164 Global Model. *Mon. Wea. Rev.*, **142**, 3425–3445, <https://doi.org/10.1175/MWR-D-13-00325.1>
- 165 **Hogan, R. J., C. Jakob, and A. J. Illingworth, 2001:** Comparison of ECMWF Winter-Season Cloud Fraction with Radar-  
166 Derived Values. *J. Appl. Meteor.*, 40, 513–525, [https://doi.org/10.1175/1520-0450\(2001\)040<0513:COEWSC>2.0.CO;2](https://doi.org/10.1175/1520-0450(2001)040<0513:COEWSC>2.0.CO;2).
- 167 **Illingworth, et al.:** Cloudnet, *Bull. Am. Meteorol. Soc.*, 88(6), 883–898, doi:10.1175/BAMS-88-6-883, 2007.
- 168 **Keeley and Mogensen, 2018:** Dynamic sea ice in the IFS, *ECMWF Newsletter* No. 156, 23–29.
- 169 **Mann, G. W., Carslaw, K. S., Spracklen, D. V., Ridley, D. A., Manktelow, P. T., Chipperfield, M. P., Pickering, S. J., and**  
170 **Johnson, C. E.:** Description and evaluation of GLOMAP-mode: a modal global aerosol microphysics model for the UKCA  
171 composition-climate model, *Geosci. Model Dev.*, 3, 519–551, <https://doi.org/10.5194/gmd-3-519-2010>, 2010.
- 172 **Meyers, et al.:** New primary ice-nucleation parameterizations in an explicit cloud model. *J. Appl. Meteorol.* 31:708–721, 1992.
- 173 **Smith:** A scheme for predicting layer clouds and their water content in a general circulation model. *Q.J.R. Meteorol. Soc.*, 116:  
174 435-460. doi:[10.1002/qj.49711649210](https://doi.org/10.1002/qj.49711649210), 1990.
- 175 **Spracklen, D. V., Carslaw, K. S., Merikanto, J., Mann, G. W., Reddington, C. L., Pickering, S., Ogren, J. A., Andrews, E.,**  
176 **Baltensperger, U., Weingartner, E., Boy, M., Kulmala, M., Laakso, L., Lihavainen, H., Kivekäs, N., Komppula, M.,**  
177 **Mihalopoulos, N., Kouvarakis, G., Jennings, S. G., O'Dowd, C., Birmili, W., Wiedensohler, A., Weller, R., Gras, J., Laj, P.,**  
178 **Sellegrì, K., Bonn, B., Krejci, R., Laaksonen, A., Hamed, A., Minikin, A., Harrison, R. M., Talbot, R., and Sun, J.:** Explaining  
179 global surface aerosol number concentrations in terms of primary emissions and particle formation, *Atmos. Chem. Phys.*, 10,  
180 4775–4793, <https://doi.org/10.5194/acp-10-4775-2010>, 2010.
- 181 **Tiedtke:** Representation of Clouds in Large-Scale Models. *Mon. Wea. Rev.*, **121**, 3040–3061, [https://doi.org/10.1175/1520-](https://doi.org/10.1175/1520-0493(1993)121<3040:ROCILS>2.0.CO;2)  
182 [0493\(1993\)121<3040:ROCILS>2.0.CO;2](https://doi.org/10.1175/1520-0493(1993)121<3040:ROCILS>2.0.CO;2), 1993.

183 **Walters et al.:** The Met Office Unified Model Global Atmosphere 7.0/7.1 and JULES Global Land 7.0 configurations, *Geosci.*  
184 *Model Dev.*, 12, 1909–1963, <https://doi.org/10.5194/gmd-12-1909-2019>, 2019.

185 **Wilson and Ballard:** A microphysically based precipitation scheme for the UK meteorological office unified model. *Q.J.R.*  
186 *Meteorol. Soc.*, 125: 1607-1636. doi:10.1002/qj.49712555707, 1999.

187 **Wilson, D.R., Bushell, A.C., Kerr-Munslow, A.M., Price, J.D. and Morcrette, C.J. (2008),** PC2: A prognostic cloud fraction  
188 and condensation scheme. I: Scheme description. *Q.J.R. Meteorol. Soc.*, 134: 2093-2107. doi:[10.1002/qj.333](https://doi.org/10.1002/qj.333)

189 **Wood and Field:** Relationships between Total Water, Condensed Water and Cloud Fraction in Stratiform Clouds Examined  
190 Using Aircraft Data, *J. Atmos. Sci.*, 57, 1888–1905, 2000.
